# Supplementary material
Source: PubMed Central journal article supplement (PMC4761612)

# SUPPLEMENTAL MATERIALS

**Table S1.** List of 341 genes screened for mutations using MSK-IMPACT assay.

|         |        |         |           |         |        |         |         |         |          |
|---------|--------|---------|-----------|---------|--------|---------|---------|---------|----------|
| ABL1    | BRCA2  | CUL3    | FANCC     | IDH1    | MAPK1  | NOTCH4  | PRDM1   | SDHAF2  | TNFAIP3  |
| AKT1    | BRD4   | DAXX    | FAT1      | IDH2    | MAX    | NPM1    | PRKAR1A | SDHB    | TNFRSF14 |
| AKT2    | BRIP1  | DCUN1D1 | FBXW7     | IFNGR1  | MCL1   | NRAS    | PTCH1   | SDHC    | TOP1     |
| AKT3    | BTK    | DDR2    | FGF19     | IGF1    | MDC1   | NSD1    | PTEN    | SDHD    | TP53     |
| ALK     | CARD11 | DICER1  | FGF3      | IGF1R   | MDM2   | NTRK1   | PTPN11  | SETD2   | TP63     |
| ALOX12B | CASP8  | DIS3    | FGF4      | IGF2    | MDM4   | NTRK2   | PTPRD   | SF3B1   | TRAF7    |
| APC     | CBFB   | DNMT1   | FGFR1     | IKBKE   | MED12  | NTRK3   | PTPRS   | SH2D1A  | TSC1     |
| AR      | CBL    | DNMT3A  | FGFR2     | IKZF1   | MEF2B  | PAK1    | PTPRT   | SHQ1    | TSC2     |
| ARAF    | CCND1  | DNMT3B  | FGFR3     | IL10    | MEN1   | PAK7    | RAC1    | SMAD2   | TSHR     |
| ARID1A  | CCND2  | DOT1L   | FGFR4     | IL7R    | MET    | PALB2   | RAD50   | SMAD3   | U2AF1    |
| ARID1B  | CCND3  | E2F3    | FH        | INPP4A  | MITF   | PARK2   | RAD51   | SMAD4   | VHL      |
| ARID2   | CCNE1  | EED     | FLCN      | INPP4B  | MLH1   | PARP1   | RAD51B  | SMARCA4 | VTCN1    |
| ARID5B  | CD274  | EGFL7   | FLT1      | INSR    | MLL    | PAX5    | RAD51C  | SMARCB1 | WT1      |
| ASXL1   | CD276  | EGFR    | FLT3      | IRF4    | MLL2   | PBRM1   | RAD51D  | SMARCD1 | XIAP     |
| ASXL2   | CD79B  | EIF1AX  | FLT4      | IRS1    | MLL3   | PDCD1   | RAD52   | SMO     | XPO1     |
| ATM     | CDC73  | EP300   | FOXA1     | IRS2    | MPL    | PDGFRA  | RAD54L  | SOCS1   | YAP1     |
| ATR     | CDH1   | EPCAM   | FOXL2     | JAK1    | MRE11A | PDGFRB  | RAF1    | SOX17   | YES1     |
| ATRX    | CDK12  | EPHA3   | FOXP1     | JAK2    | MSH2   | PDPK1   | RARA    | SOX2    |          |
| AURKA   | CDK4   | EPHA5   | FUBP1     | JAK3    | MSH6   | PHOX2B  | RASA1   | SOX9    |          |
| AURKB   | CDK6   | EPHB1   | GATA1     | JUN     | MTOR   | PIK3C2G | RB1     | SPEN    |          |
| AXIN1   | CDK8   | ERBB2   | GATA2     | KDM5A   | MUTYH  | PIK3C3  | RBM10   | SPOP    |          |
| AXIN2   | CDKN1A | ERBB3   | GATA3     | KDM5C   | MYC    | PIK3CA  | RECQL4  | SRC     |          |
| AXL     | CDKN1B | ERBB4   | GNA11     | KDM6A   | MYCL1  | PIK3CB  | REL     | STAG2   |          |
| B2M     | CDKN2A | ERCC2   | GNAQ      | KDR     | MYCN   | PIK3CD  | RET     | STK11   |          |
| BAP1    | CDKN2B | ERCC3   | GNAS      | KEAP1   | MYD88  | PIK3CG  | RFWD2   | STK40   |          |
| BARD1   | CDKN2C | ERCC4   | GREM1     | KIT     | MYOD1  | PIK3R1  | RHOA    | SUFU    |          |
| BBC3    | CHEK1  | ERCC5   | GRIN2A    | KLF4    | NBN    | PIK3R2  | RICTOR  | SUZ12   |          |
| BCL2    | CHEK2  | ERG     | GSK3B     | KRAS    | NCOR1  | PIK3R3  | RIT1    | SYK     |          |
| BCL2L1  | CIC    | ESR1    | H3F3C     | LATS1   | NF1    | PIM1    | RNF43   | TBX3    |          |
| BCL2L11 | CREBBP | ETV1    | HGF       | LATS2   | NF2    | PLK2    | ROS1    | TERT    |          |
| BCL6    | CRKL   | ETV6    | HIST1H1C  | LMO1    | NFE2L2 | PMAIP1  | RPS6KA4 | TET1    |          |
| BCOR    | CRLF2  | EZH2    | HIST1H2BD | MAP2K1  | NKX2-1 | PMS1    | RPS6KB2 | TET2    |          |
| BLM     | CSF1R  | FAM123B | HIST1H3B  | MAP2K2  | NKX3-1 | PMS2    | RPTOR   | TGFBR1  |          |
| BMPR1A  | CTCF   | FAM175A | HNF1A     | MAP2K4  | NOTCH1 | PNRC1   | RUNX1   | TGFBR2  |          |
| BRAF    | CTLA4  | FAM46C  | HRAS      | MAP3K1  | NOTCH2 | POLE    | RYBP    | TMEM127 |          |
| BRCA1   | CTNNB1 | FANCA   | ICOSLG    | MAP3K13 | NOTCH3 | PPP2R1A | SDHA    | TMPRSS2 |          |

**Table S2.** Additional mutations identified in small cell carcinoma of the ovary, hypercalcemic type case 113.

|          | Genes with high or medium functional impact mutations | Mutation Type        | Protein Change | Allele Freq. | Tumor Seq. Reads | Functional Impact | Genes with low functional impact mutations           |
|----------|-------------------------------------------------------|----------------------|----------------|--------------|------------------|-------------------|------------------------------------------------------|
| Case 113 | <i>TP53</i><br><i>POLE</i>                            | Missense<br>Missense | I254N<br>D287E | 0.98<br>0.47 | 378              | Medium<br>Medium  | <i>ABL1, ASXL2, PAK1, ATRX, MED12, KMT2D, PDGFRB</i> |

**Table S3.** Summary of the SMARCA2 and SMARCA4 immunohistochemistry staining for the non- small cell carcinoma of the ovary, hypercalcemic type cases

| Case number | Diagnosis            | Primary Site                            | SMARCA4 IHC     | SMARCA2 IHC |
|-------------|----------------------|-----------------------------------------|-----------------|-------------|
| 1           | Clear cell carcinoma | Ovary                                   | Weakly retained | Retained    |
| 2           | Clear cell carcinoma | Ovary                                   | Weakly retained | Retained    |
| 3           | Clear cell carcinoma | Ovary                                   | Weakly retained | Retained    |
| 4           | Clear cell carcinoma | Ovary                                   | Retained        | Retained    |
| 5           | Clear cell carcinoma | Ovary                                   | Retained        | Retained    |
| 6           | Clear cell carcinoma | Ovary                                   | Retained        | Retained    |
| 7           | Clear cell carcinoma | Ovary                                   | Retained        | Retained    |
| 8           | Clear cell carcinoma | Ovary                                   | Retained        | Retained    |
| 9           | Clear cell carcinoma | Ovary                                   | Retained        | Retained    |
| 10          | Clear cell carcinoma | Ovary                                   | Retained        | Retained    |
| 11          | Clear cell carcinoma | Ovary                                   | Retained        | Retained    |
| 12          | Clear cell carcinoma | Ovary                                   | Retained        | Retained    |
| 13          | Clear cell carcinoma | Ovary                                   | Retained        | Retained    |
| 14          | Clear cell carcinoma | Ovary                                   | Retained        | Retained    |
| 15          | Clear cell carcinoma | Ovary                                   | Retained        | Retained    |
| 16          | Clear cell carcinoma | Ovary                                   | Retained        | Retained    |
| 17          | Clear cell carcinoma | Ovary                                   | Retained        | Retained    |
| 18          | Clear cell carcinoma | Ovary                                   | Retained        | Loss        |
| 19          | Clear cell carcinoma | Ovary                                   | Retained        | Retained    |
| 20          | Clear cell carcinoma | Ovary                                   | Loss            | Retained    |
| 21          | Granulosa cell tumor | Ovary                                   | Retained        | Retained    |
| 22          | Granulosa cell tumor | Ovary                                   | Retained        | Retained    |
| 23          | Granulosa cell tumor | Ovary                                   | Retained        | Retained    |
| 24          | Granulosa cell tumor | Ovary                                   | Retained        | Retained    |
| 25          | Granulosa cell tumor | Ovary                                   | Retained        | Retained    |
| 26          | Granulosa cell tumor | Ovary                                   | Retained        | Retained    |
| 27          | Granulosa cell tumor | Ovary                                   | Retained        | Retained    |
| 28          | Granulosa cell tumor | Ovary                                   | Retained        | Retained    |
| 29          | Granulosa cell tumor | Ovary                                   | Retained        | Retained    |
| 30          | Granulosa cell tumor | Ovary                                   | Retained        | Retained    |
| 31          | Melanoma             | Ovarian metastasis from upper extremity | Retained        | Retained    |
| 32          | Melanoma             | Ovarian metastasis from unknown primary | Loss            | Retained    |
| 33          | Melanoma             | Vulva                                   | Retained        | Retained    |
| 34          | Melanoma             | Vulva                                   | Retained        | Retained    |
| 35          | Melanoma             | Vulva                                   | Retained        | Retained    |
| 36          | Melanoma             | Cervix                                  | Retained        | Retained    |
| 37          | Melanoma             | Vulva                                   | Retained        | Retained    |
| 38          | Melanoma             | Vagina                                  | Weakly retained | Retained    |
| 39          | Melanoma             | Vagina                                  | Retained        | Retained    |
| 40          | Melanoma             | Vagina                                  | Retained        | Retained    |
| 41          | Small cell carcinoma | Lung                                    | Retained        | Retained    |
| 42          | Small cell carcinoma | Lung                                    | Retained        | Retained    |
| 43          | Small cell carcinoma | Lung                                    | Retained        | Retained    |
| 44          | Small cell carcinoma | Lung                                    | Retained        | Retained    |
| 45          | Small cell carcinoma | Lung                                    | Retained        | Retained    |
| 46          | Small cell carcinoma | Lung                                    | Retained        | Retained    |
| 47          | Small cell carcinoma | Lung                                    | Retained        | Retained    |
| 48          | Small cell carcinoma | Lung                                    | Retained        | Retained    |
| 49          | Small cell carcinoma | Lung                                    | Retained        | Retained    |
| 50          | Small cell carcinoma | Lung                                    | Retained        | Retained    |

## Supplemental titles and legends of figures

**Figure S1.** Sequence analysis of *SMARCA4* small cell carcinoma of the ovary, hypercalcemic type case 114. Top panel: next-generation sequence coverage demonstrating identified variants. Bottom panel: validation by Sanger sequencing.

**Figure S2.** Immunohistochemistry for SMARCA2 and SMARCA4 in fresh-frozen, paraffin-embedded, non-small cell carcinoma of the ovary, hypercalcemic type cases: small cell lung carcinoma (SCLC), granulosa cell tumor (GCT) of the ovary, ovarian clear cell carcinoma (OCCC) and melanomas (Mel).



Figure S1

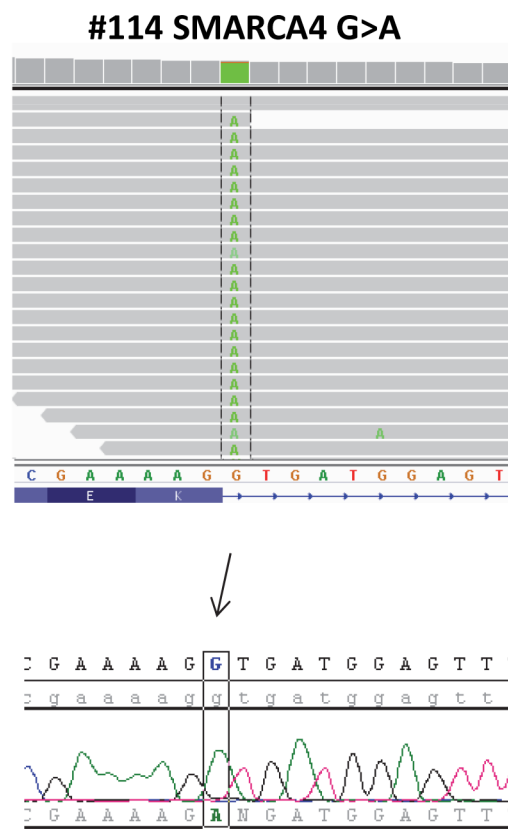

**Figure S2**

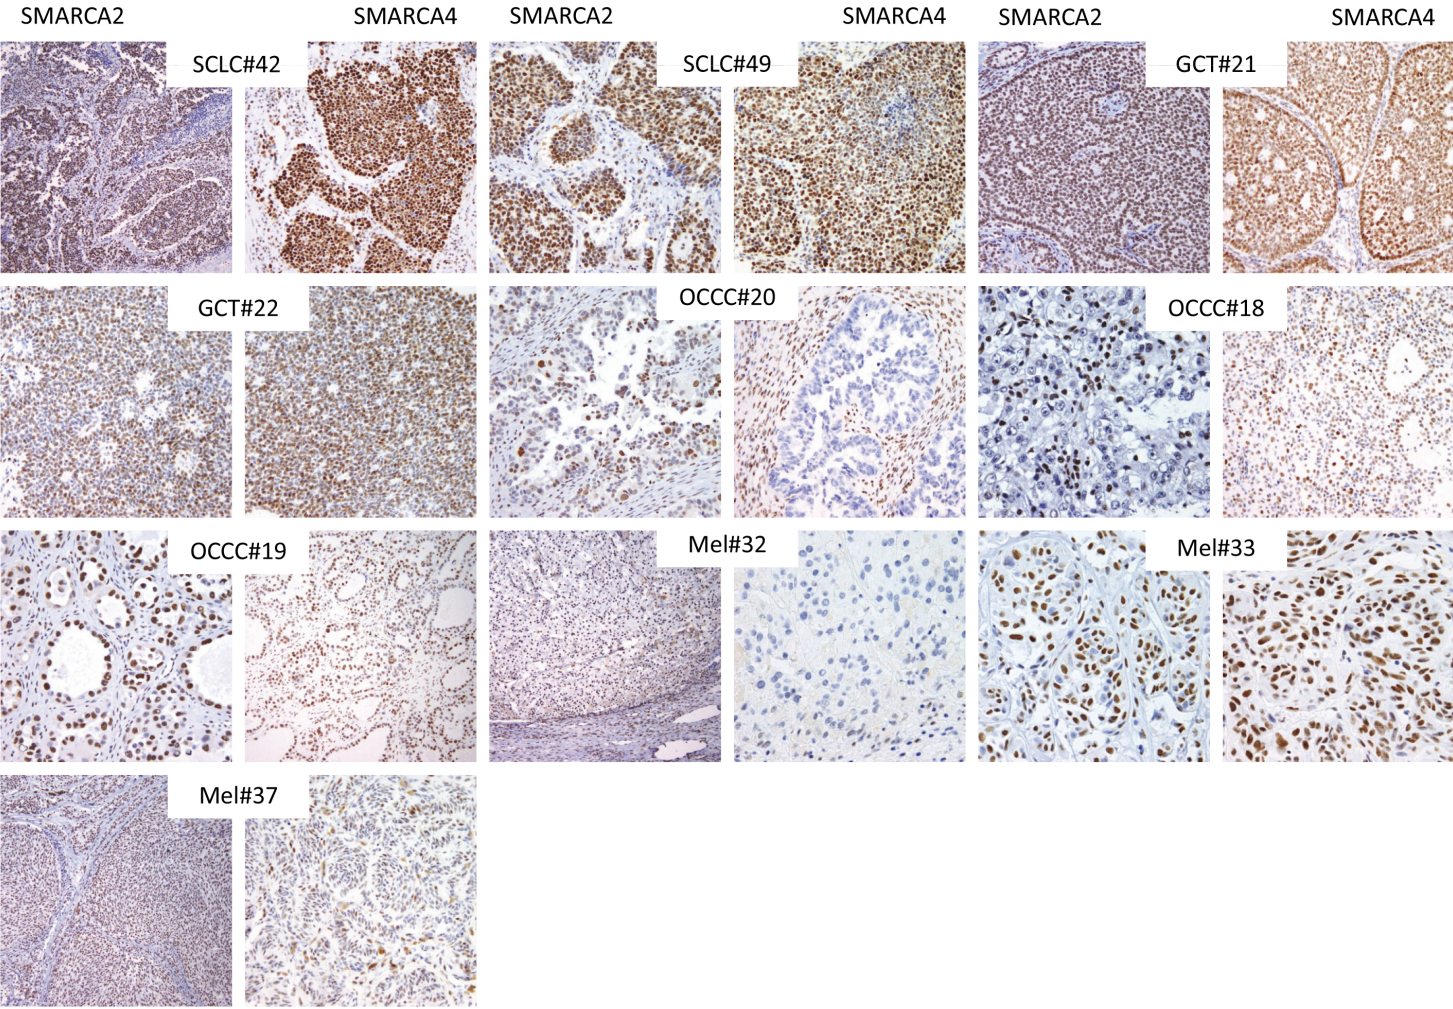

Supplement: modpathol2015129x1.pdf [file modpathol2015129x1.pdf]
